# Supplementary material for: Investigation of the preparation and reactivity of metal–organic frameworks of cerium and pyridine-2,4,6-tricarboxylate
Source: Royal Society of Chemistry journal article supplement (doi:10.1039/d1dt03514b), 2021-11-29
Supplement: d1dt03514b1.pdf [file d1dt03514b1.pdf]

## Supporting Information

### Investigation of the Preparation and Reactivity of Metal-Organic Frameworks of Cerium and Pyridine-2,4,6-Tricarboxylate

Juliana Fonseca de Lima, Fernanda V. S. Moreno, Bruno A. T. Menezes, Jader da Silva Barbosa, Matthew C. Waddington, Siân A. Franklin, Guy J. Clarkson, Marc Walker, Osvaldo A. Serra, and Richard I. Walton

**Table S1: Crystal data for the Ce-PTC materials prepared in this work**

| Compound                                              | (1)                                                                          | (2)                                                                            | (3)                                                                          |
|-------------------------------------------------------|------------------------------------------------------------------------------|--------------------------------------------------------------------------------|------------------------------------------------------------------------------|
| CCDC reference                                        | 2110897                                                                      | 2110895                                                                        | 2110894                                                                      |
| Empirical formula                                     | C <sub>8</sub> H <sub>6</sub> CeNO <sub>9.5</sub>                            | C <sub>16</sub> H <sub>16</sub> Ce <sub>2</sub> N <sub>2</sub> O <sub>18</sub> | C <sub>11</sub> H <sub>13</sub> CeN <sub>2</sub> O <sub>9</sub>              |
| Formula weight / gmol <sup>-1</sup>                   | 408.26                                                                       | 804.55                                                                         | 457.35                                                                       |
| Temperature /K                                        | 150(2)                                                                       | 150(2)                                                                         | 150(2)                                                                       |
| Crystal system                                        | monoclinic                                                                   | monoclinic                                                                     | monoclinic                                                                   |
| Space group                                           | <i>P2</i> <sub>1</sub> / <i>c</i>                                            | <i>Pc</i>                                                                      | <i>Cc</i>                                                                    |
| <i>a</i> /Å                                           | 6.79808(15)                                                                  | 6.70661(9)                                                                     | 15.8285(3)                                                                   |
| <i>b</i> /Å                                           | 12.0497(3)                                                                   | 9.44049(14)                                                                    | 10.1903(9)                                                                   |
| <i>c</i> /Å                                           | 13.5329(3)                                                                   | 17.0698(2)                                                                     | 9.1832(3)                                                                    |
| $\alpha$ /°                                           | 90                                                                           | 90                                                                             | 90                                                                           |
| $\beta$ /°                                            | 100.334(2)                                                                   | 92.4339(12)                                                                    | 90.062(4)                                                                    |
| $\gamma$ /°                                           | 90                                                                           | 90                                                                             | 90                                                                           |
| Volume /Å <sup>3</sup>                                | 1090.56(5)                                                                   | 1079.77(3)                                                                     | 1481.22(15)                                                                  |
| <i>Z</i>                                              | 4                                                                            | 2                                                                              | 4                                                                            |
| $\rho_{\text{calc}}$ g/cm <sup>3</sup>                | 2.487                                                                        | 2.475                                                                          | 2.051                                                                        |
| $\mu$ /mm <sup>-1</sup>                               | 4.227                                                                        | 4.264                                                                          | 3.123                                                                        |
| F(000)                                                | 780.0                                                                        | 772.0                                                                          | 892.0                                                                        |
| Crystal size /mm <sup>3</sup>                         | 0.124 × 0.116 × 0.074                                                        | 0.2 × 0.16 × 0.06                                                              | 0.16 × 0.08 × 0.04                                                           |
| Radiation ( $\lambda$ / Å)                            | MoK $\alpha$ ( $\lambda$ = 0.71073)                                          | MoK $\alpha$ ( $\lambda$ = 0.71073)                                            | MoK $\alpha$ ( $\lambda$ = 0.71073)                                          |
| 2 $\Theta$ range for data collection/°                | 6.092 to 62.816                                                              | 4.932 to 61.352                                                                | 6.502 to 59.43                                                               |
| Index ranges                                          | -9 ≤ <i>h</i> ≤ 9, -17 ≤ <i>k</i> ≤ 17, -19 ≤ <i>l</i> ≤ 19                  | -9 ≤ <i>h</i> ≤ 9, -13 ≤ <i>k</i> ≤ 13, -24 ≤ <i>l</i> ≤ 24                    | -21 ≤ <i>h</i> ≤ 21, -13 ≤ <i>k</i> ≤ 13, -12 ≤ <i>l</i> ≤ 12                |
| Reflections collected                                 | 17555                                                                        | 43697                                                                          | 10412                                                                        |
| Independent reflections                               | 3369 [ <i>R</i> <sub>int</sub> = 0.0457, <i>R</i> <sub>sigma</sub> = 0.0354] | 6306 [ <i>R</i> <sub>int</sub> = 0.0450, <i>R</i> <sub>sigma</sub> = 0.0321]   | 3584 [ <i>R</i> <sub>int</sub> = 0.0265, <i>R</i> <sub>sigma</sub> = 0.0289] |
| Data/restraints/parameters                            | 3369/6/202                                                                   | 6306/26/379                                                                    | 3584/26/232                                                                  |
| Goodness-of-fit on F <sup>2</sup>                     | 1.335                                                                        | 1.043                                                                          | 1.058                                                                        |
| Final R indexes [ <i>I</i> ≥ 2 $\sigma$ ( <i>I</i> )] | <i>R</i> <sub>1</sub> = 0.0467, <i>wR</i> <sub>2</sub> = 0.0892              | <i>R</i> <sub>1</sub> = 0.0211, <i>wR</i> <sub>2</sub> = 0.0427                | <i>R</i> <sub>1</sub> = 0.0169, <i>wR</i> <sub>2</sub> = 0.0357              |
| Final R indexes [all data]                            | <i>R</i> <sub>1</sub> = 0.0540, <i>wR</i> <sub>2</sub> = 0.0914              | <i>R</i> <sub>1</sub> = 0.0228, <i>wR</i> <sub>2</sub> = 0.0437                | <i>R</i> <sub>1</sub> = 0.0178, <i>wR</i> <sub>2</sub> = 0.0363              |
| Largest diff. peak/hole / e Å <sup>-3</sup>           | 2.04/−2.32                                                                   | 0.96/−0.70                                                                     | 0.38/−0.45                                                                   |
| Flack parameter                                       | -                                                                            | −0.021(7)                                                                      | −0.028(7)                                                                    |

**Table S2: Comparison between the crystal structure of (1), (2) and (3) and previously reported structures. See Figure S1 for PTC binding modes.**

| Material                                                              | <i>a</i> / Å | <i>b</i> / Å | <i>c</i> / Å | $\beta$ (°)  | <i>V</i> / Å <sup>3</sup> | Space Group             | Temp / K | PTC Binding Mode | Reference(s)  |
|-----------------------------------------------------------------------|--------------|--------------|--------------|--------------|---------------------------|-------------------------|----------|------------------|---------------|
| [Pr(PTC)(H <sub>2</sub> O) <sub>2</sub> ] $\cdot$ 2H <sub>2</sub> O   | 6.754(5)     | 11.937(2)    | 13.456(5)    | 100.381(5)   | 1067.1                    | <i>P2<sub>1</sub>/c</i> | 100      | Type VII         | 1             |
| [Nd(PTC)(H <sub>2</sub> O) <sub>2</sub> ] $\cdot$ 2H <sub>2</sub> O   | 6.751(5)     | 11.916(3)    | 13.457(5)    | 103.105(5)   | 1054.4                    | <i>P2<sub>1</sub>/c</i> | 100      | Type VII         | 1             |
| [Pr(PTC)(H <sub>2</sub> O) <sub>2</sub> ] $\cdot$ 1.5H <sub>2</sub> O | 6.7981(12)   | 11.978(2)    | 13.515(3)    | 100.174(2)   | 1083.1(3)                 | <i>P2<sub>1</sub>/c</i> | 293      | Type VII         | 2             |
| [Ce(PTC)(H <sub>2</sub> O) <sub>2</sub> ] $\cdot$ H <sub>2</sub> O    | 6.8545(8)    | 12.077(1)    | 13.625(2)    | 100.035(1)   | 1110.6                    | <i>P2<sub>1</sub>/c</i> | 291      | Type VII         | 3             |
| [Ce(PTC)(H <sub>2</sub> O) <sub>2</sub> ] $\cdot$ 1.5H <sub>2</sub> O | 6.7970(3)    | 12.0415(6)   | 13.5364(7)   | 100.3156(47) | 1090.0                    | <i>P2<sub>1</sub>/c</i> | 150      | Type VII         | (1) This work |
| Ce(PTC) $\cdot$ 3H <sub>2</sub> O                                     | 6.7066(1)    | 9.4405(1)    | 17.0698(2)   | 92.4339(12)  | 1079.78(3)                | <i>Pc</i>               | 150      | Type XII         | (2) This work |
| [Ce(PTC)(H <sub>2</sub> O) <sub>3</sub> ] $\cdot$ H <sub>2</sub> O    | 12.1373(5)   | 7.4129(3)    | 13.6653(5)   | 96.508(2)    | 1221.6                    | <i>P2<sub>1</sub>/c</i> | 296      | Type XI          | 4             |
| [Ce(PTC)(H <sub>2</sub> O) <sub>5</sub> ] $\cdot$ 4H <sub>2</sub> O   | 6.8437 (3)   | 13.3207(5)   | 17.9045 (7)  | 90           | 1632.23                   | <i>Pna2<sub>1</sub></i> | 293      | Type XIV         | 5             |
| [Ce(PTC)(H <sub>2</sub> O)(DMF)] $\cdot$ H <sub>2</sub> O             | 15.8285(3)   | 10.1903(9)   | 9.1832(3)    | 90.062       | 1481.22(15)               | <i>Cc</i>               | 150      | Type XIII        | (3) This work |

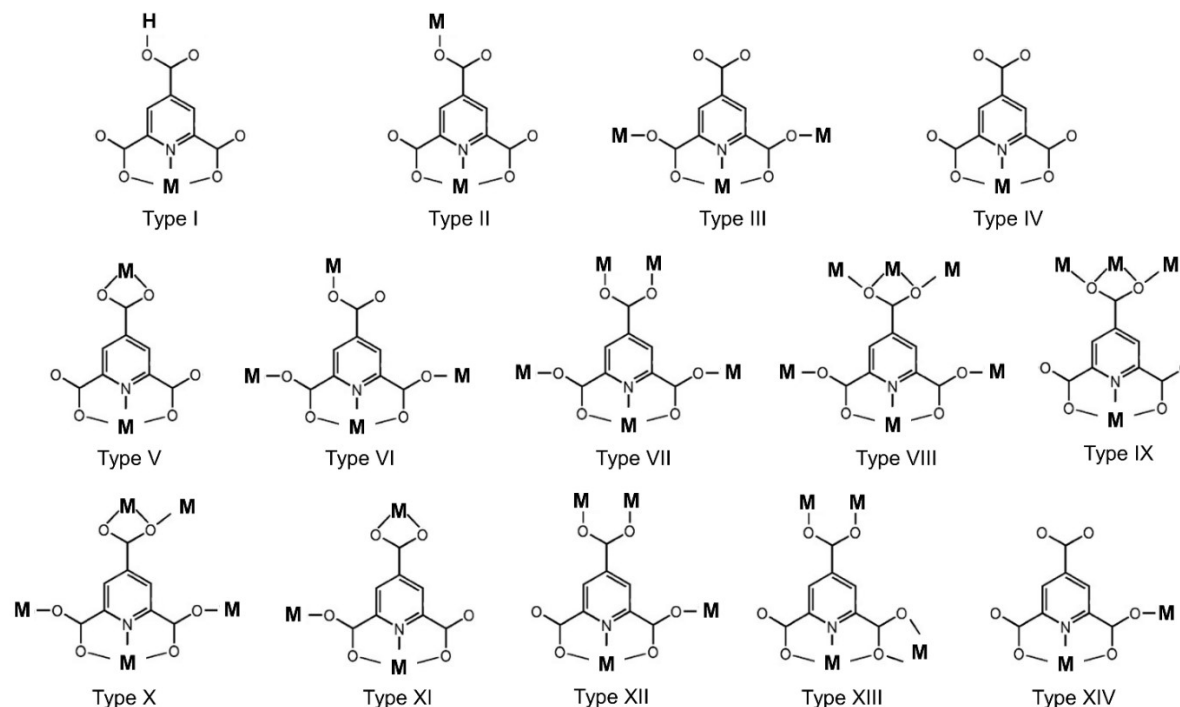

**Figure S1: Binding modes for PTC seen in lanthanide and transition-metal coordination polymers using the classification of Das *et al.* (Types I-XI).<sup>6</sup> Type XII is an additional binding mode seen in (2), Type XIV is seen in the material, [Ce(PTC)(H<sub>2</sub>O)<sub>5</sub>] $\cdot$ 4H<sub>2</sub>O,<sup>5</sup> and Type XIII is seen in (3)**

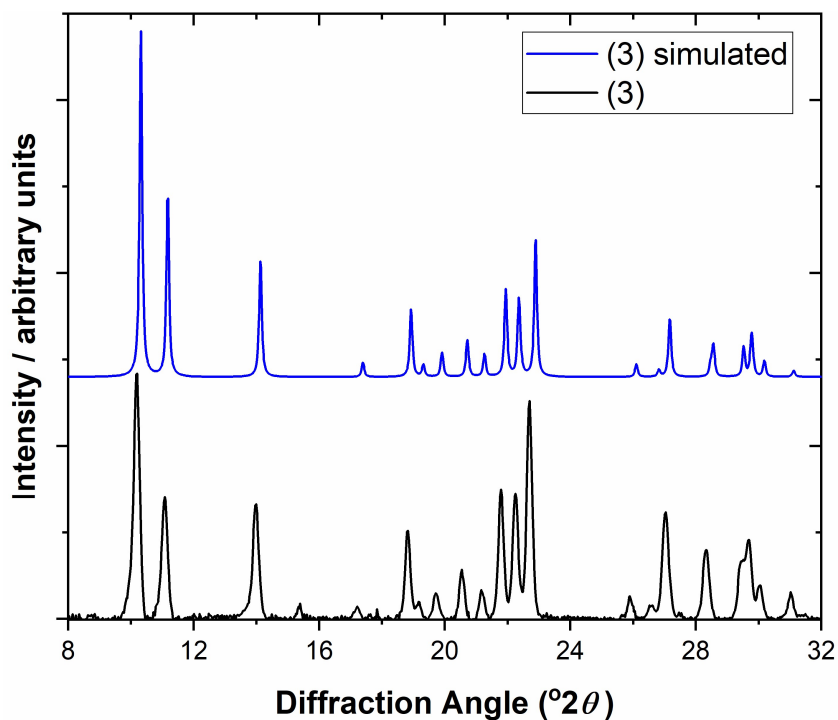

Figure S2: Simulated and measured powder XRD of (3)

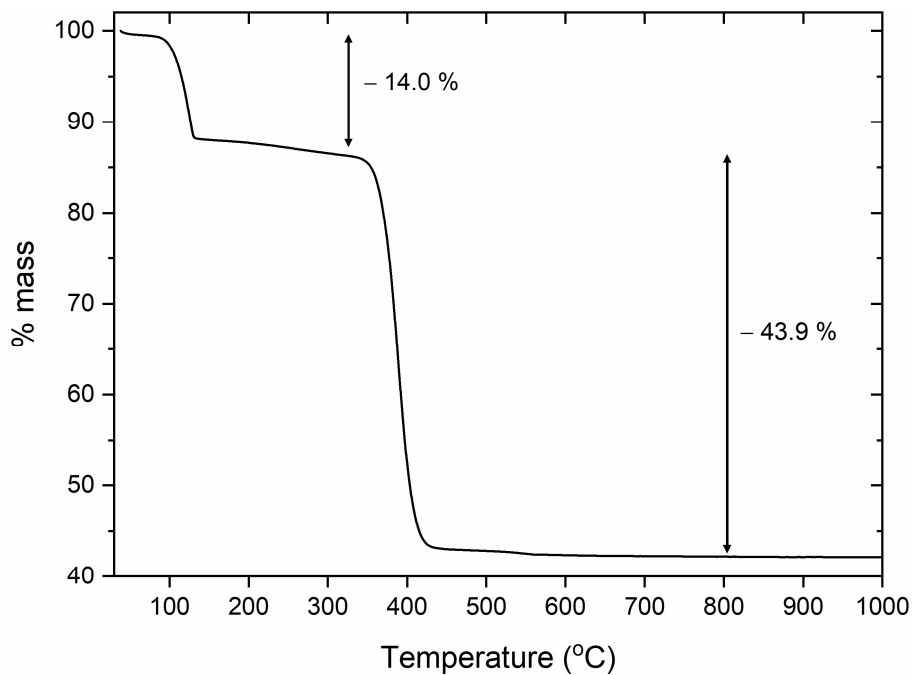

Figure S3: Thermogravimetric analysis of (1)

Table S3: Assignment of TGA of (1)

| Decomposition step                                                                                            | Calculated % Mass Loss | Observed % Mass Loss |
|---------------------------------------------------------------------------------------------------------------|------------------------|----------------------|
| $[\text{Ce}(\text{PTC})(\text{H}_2\text{O})_2] \cdot 1.5\text{H}_2\text{O} \rightarrow \text{Ce}(\text{PTC})$ | 15.3                   | 14.0                 |
| $\text{Ce}(\text{PTC}) \rightarrow \text{CeO}_2$                                                              | 42.4                   | 43.9                 |

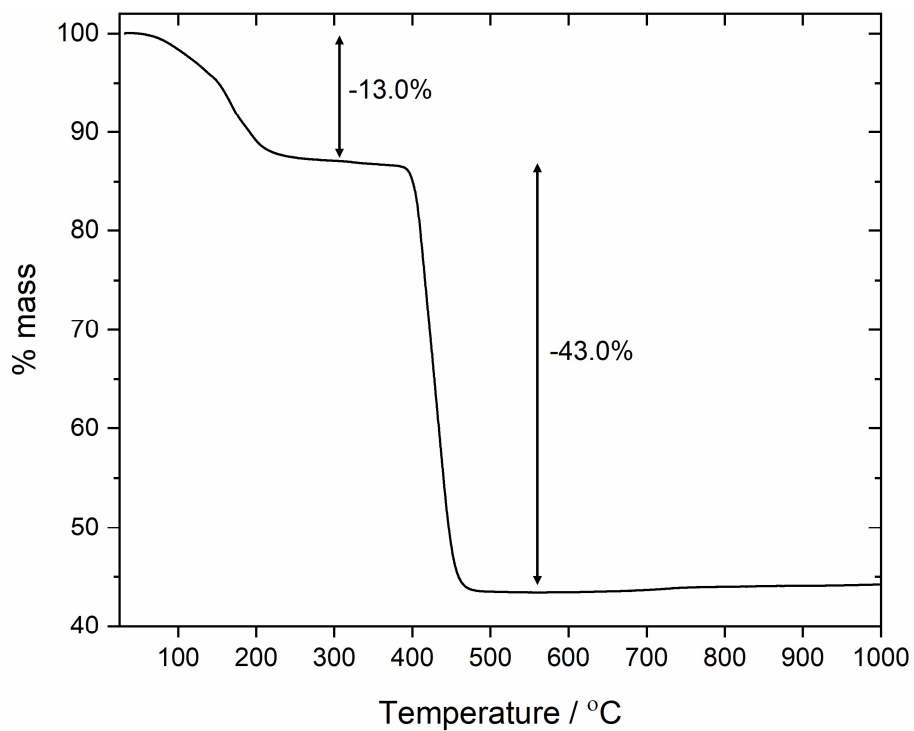

**Figure S4:** Thermogravimetric analysis of (2).

**Table S4:** Assignment of TGA of (2)

| <b>Decomposition step</b>                                                                   | <b>Calculated % Mass Loss</b> | <b>Observed % Mass Loss</b> |
|---------------------------------------------------------------------------------------------|-------------------------------|-----------------------------|
| $\text{Ce}_2(\text{PTC})_2 \cdot 6\text{H}_2\text{O} \rightarrow \text{Ce}_2(\text{PTC})_2$ | 13.4                          | 13.0                        |
| $\text{Ce}_2(\text{PTC})_2 \rightarrow 2\text{CeO}_2$                                       | 43.9                          | 43.0                        |

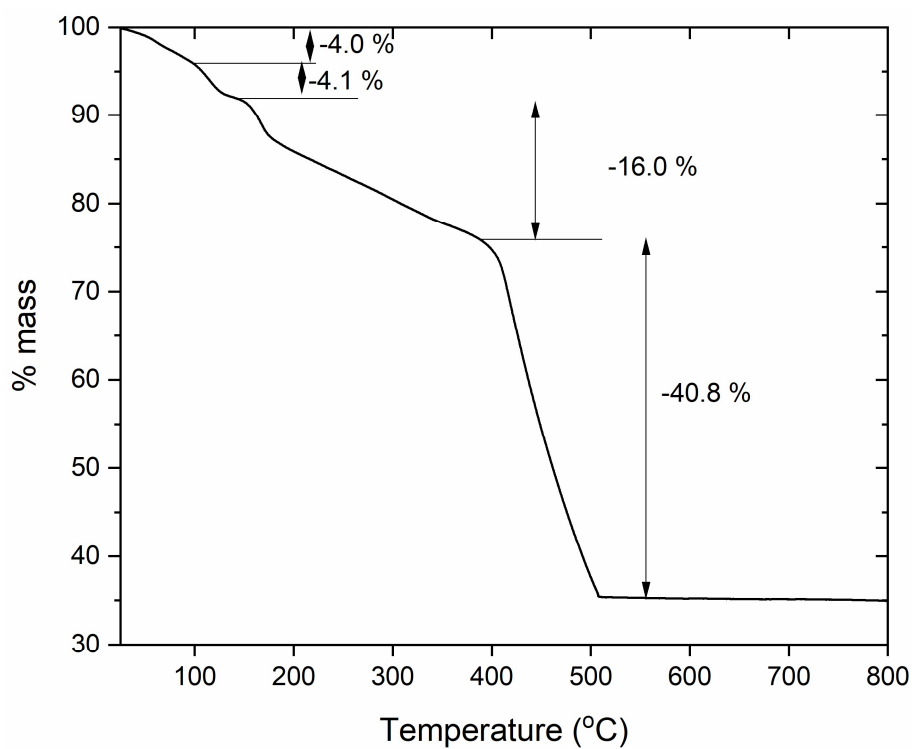

**Figure S5: Thermogravimetric analysis of (3)**

**Table S5: Assignment of TGA of (3)**

| Decomposition step                                                                                                                                     | Calculated % Mass Loss | Observed % Mass Loss |
|--------------------------------------------------------------------------------------------------------------------------------------------------------|------------------------|----------------------|
| $[\text{Ce}(\text{PTC})(\text{H}_2\text{O})(\text{DMF})] \cdot \text{H}_2\text{O} \rightarrow [\text{Ce}(\text{PTC})(\text{H}_2\text{O})(\text{DMF})]$ | 3.94                   | 4.0                  |
| $[\text{Ce}(\text{PTC})(\text{H}_2\text{O})(\text{DMF})] \rightarrow [\text{Ce}(\text{PTC})(\text{DMF})]$                                              | 3.94                   | 4.1                  |
| $[\text{Ce}(\text{PTC})(\text{DMF})] \rightarrow \text{Ce}(\text{PTC})$                                                                                | 16.0                   | 16.0                 |
| $\text{Ce}(\text{PTC}) \rightarrow \text{CeO}_2$                                                                                                       | 38.5                   | 40.8                 |

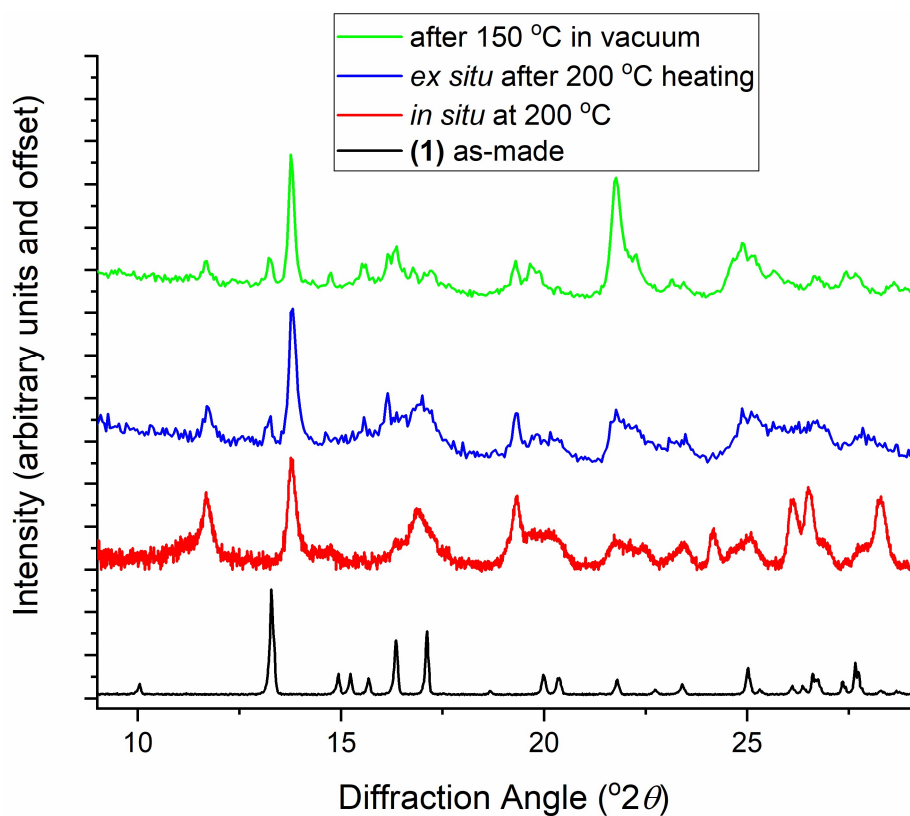

Figure S6: Powder XRD (1) after removal of water under different conditions.

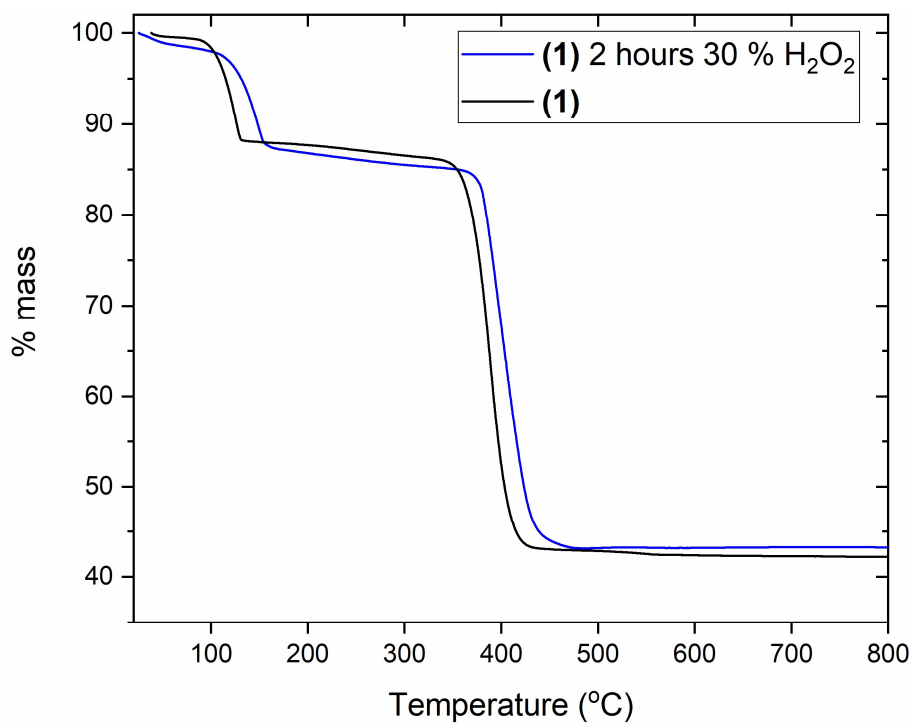

Figure S7: TGA of (1) before and after treatment with  $\text{H}_2\text{O}_2$

**Table S6: Crystal data for Na<sub>3</sub>PTC**

|                                                       |                                                                  |
|-------------------------------------------------------|------------------------------------------------------------------|
| CCDC reference                                        | 2110896                                                          |
| Empirical formula                                     | C <sub>8</sub> H <sub>2</sub> NNa <sub>3</sub> O <sub>6</sub>    |
| Formula weight / gmol <sup>-1</sup>                   | 277.08                                                           |
| Temperature /K                                        | 150(2)                                                           |
| Crystal system                                        | monoclinic                                                       |
| Space group                                           | <i>Cc</i>                                                        |
| <i>a</i> /Å                                           | 3.42187(8)                                                       |
| <i>b</i> /Å                                           | 16.9689(4)                                                       |
| <i>c</i> /Å                                           | 15.1988(4)                                                       |
| $\alpha$ /°                                           | 90                                                               |
| $\beta$ /°                                            | 91.590(2)                                                        |
| $\gamma$ /°                                           | 90                                                               |
| Volume /Å <sup>3</sup>                                | 882.19(3)                                                        |
| <i>Z</i>                                              | 4                                                                |
| $\rho_{\text{calc}}$ g/cm <sup>3</sup>                | 2.086                                                            |
| $\mu$ /mm <sup>-1</sup>                               | 0.297                                                            |
| F(000)                                                | 552.0                                                            |
| Crystal size /mm <sup>3</sup>                         | 0.16 × 0.1 × 0.01                                                |
| Radiation ( $\lambda$ / Å)                            | MoK $\alpha$ ( $\lambda$ = 0.71073)                              |
| 2 $\Theta$ range for data collection/°                | 7.2 to 63.54°                                                    |
| Index ranges                                          | -5 ≤ <i>h</i> ≤ 5, -24 ≤ <i>k</i> ≤ 24, -21 ≤ <i>l</i> ≤ 22      |
| Reflections collected                                 | 12566                                                            |
| Independent reflections                               | 2773 [ <i>R</i> (int) = 0.0229]                                  |
| Data/restraints/parameters                            | 2773/2/163                                                       |
| Goodness-of-fit on F <sup>2</sup>                     | 1.122                                                            |
| Final R indexes [ <i>I</i> ≥ 2 $\sigma$ ( <i>I</i> )] | <i>R</i> <sub>1</sub> = 0.0229, w <i>R</i> <sub>2</sub> = 0.0631 |
| Final R indexes [all data]                            | <i>R</i> <sub>1</sub> = 0.0234, w <i>R</i> <sub>2</sub> = 0.0635 |
| Largest diff. peak/hole / e Å <sup>-3</sup>           | 0.33/−0.21                                                       |
| Flack parameter                                       | −0.08(7)                                                         |

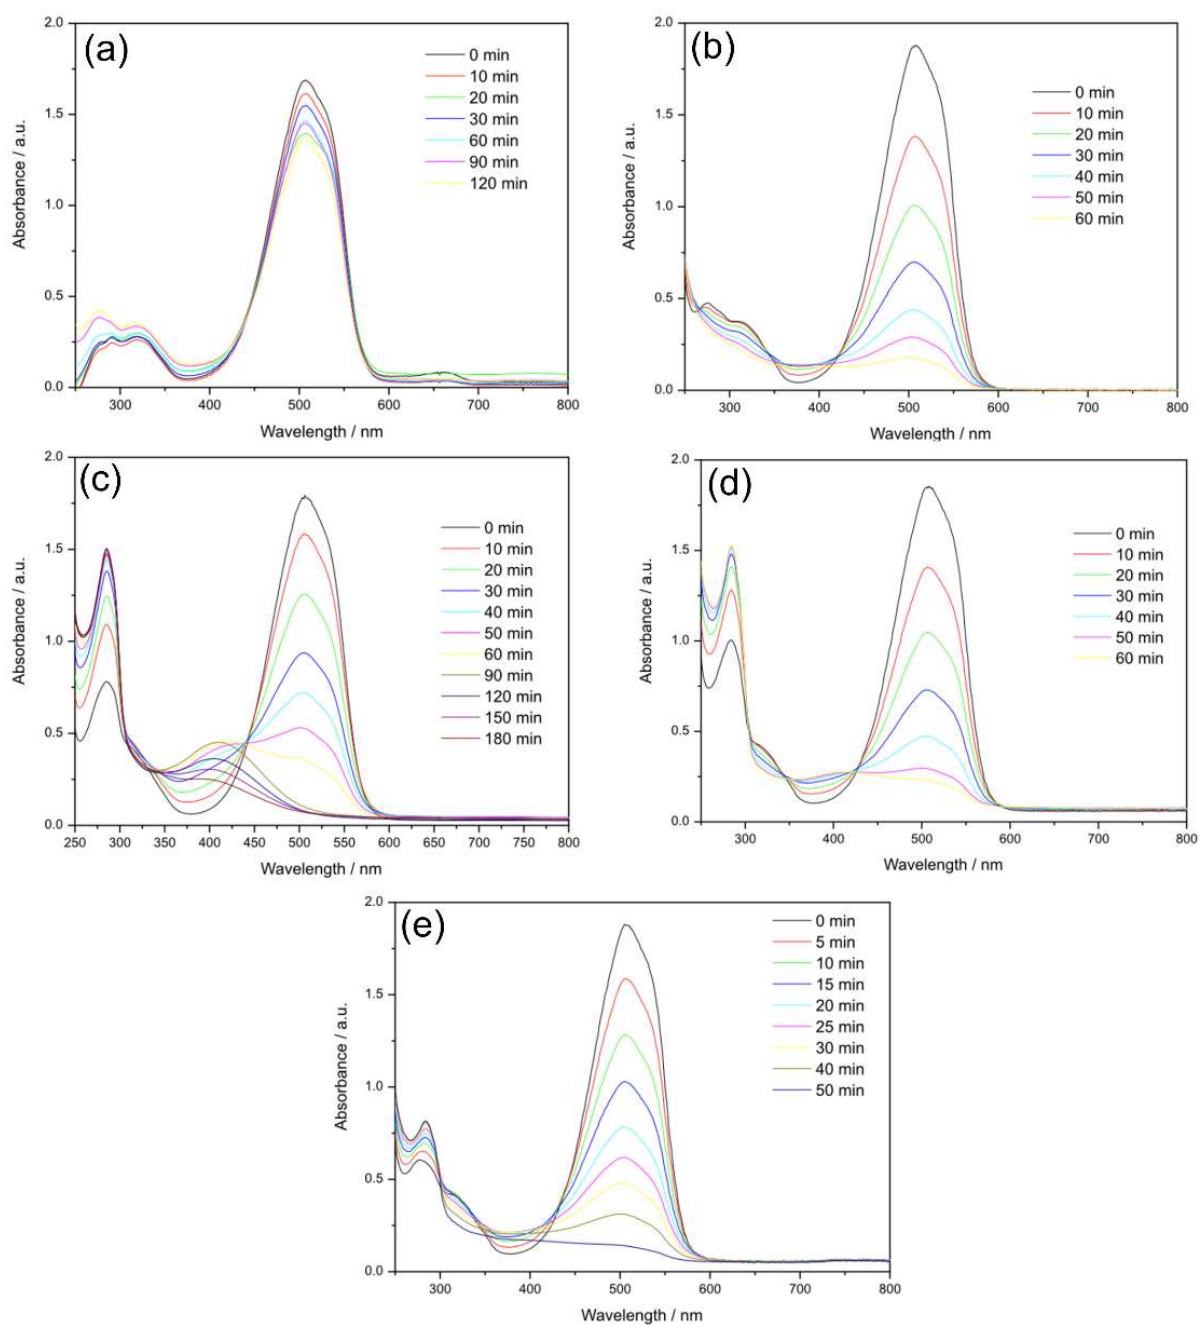

**Figure S8: UV-Vis spectra recorded during photocatalysis experiments: a) in absence of catalyst, b) in absence of catalyst + H<sub>2</sub>O<sub>2</sub>, c) (1) alone, d) (1) previously oxidised and e) (1) alone + H<sub>2</sub>O<sub>2</sub> (10 μL).**



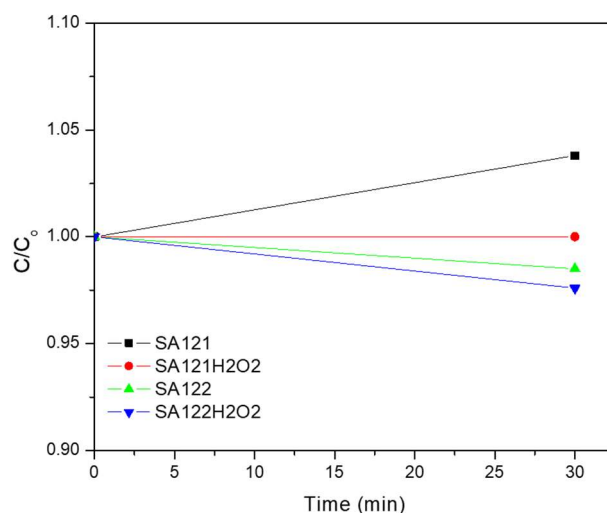

Figure S9: UV-Vis spectra recorded in darkness

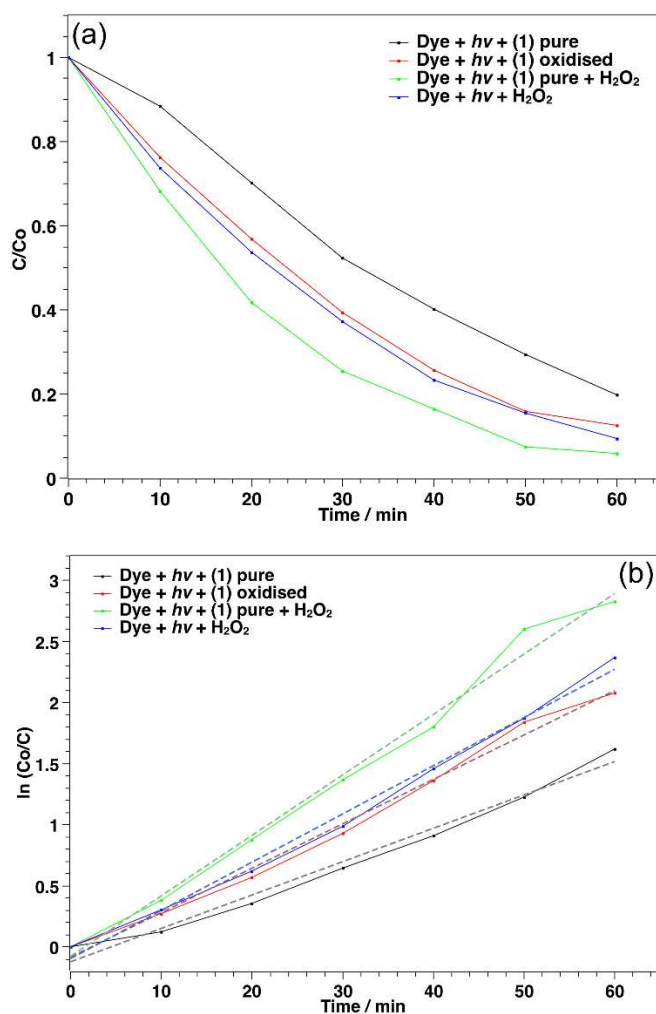

Figure S10: (a) Photodegradation of methyl orange at catalysts, 25 °C, UV light (250 W), and H<sub>2</sub>O<sub>2</sub> (0.01 M) for blue and green curves. (a) Kinetic fit of the time trace and linear plots (pseudo first-order) of the UV-VIS band at  $\lambda_{\max} = 505$  nm.  $R^2 = 0.982$  (black), 0.992 (red), 0.987 (green) and 0.992 (blue).  $k_{\text{obs}} = 0.0272$  min<sup>-1</sup> (black), 0.0363 min<sup>-1</sup> (red), 0.0508 min<sup>-1</sup> (green) and 0.0395 min<sup>-1</sup> (blue).

**Table S7: Likely hydrogen bonded interactions in the crystal structure of (1) in the range 2.5 – 3 Å. Note that occluded water molecule sites O3, O4 and O5 are not fully occupied.**

| Atom1 | Atom2 | Distance / Å |
|-------|-------|--------------|
| O1A   | O9A   | 2.8699       |
|       | O2    | 2.9515       |
|       | O9B   | 2.9656       |
| O8A   | O1B   | 2.8381       |
|       | O2    | 2.9776       |
| O9B   | O1    | 2.9024       |
|       | O1A   | 2.9656       |
|       | O2    | 2.9988       |
| O8B   | O3    | 2.8248       |
| O2    | O5    | 2.6887       |
|       | O1A   | 2.9515       |
|       | O8A   | 2.9776       |
|       | O9B   | 2.9988       |
| O9A   | O1A   | 2.8699       |
|       | O5    | 2.8975       |
| O1B   | O8A   | 2.8381       |
| O1    | O3    | 2.7293       |
|       | O4    | 2.8915       |
|       | O9B   | 2.9024       |
| O8A   | O1B   | 2.8381       |
|       | O2    | 2.9776       |
| O9B   | O1    | 2.9024       |
|       | O1A   | 2.9656       |
|       | O2    | 2.9988       |
| O8B   | O3    | 2.8248       |
| O9A   | O1A   | 2.8699       |
|       | O5    | 2.8975       |
| O1B   | O8A   | 2.8381       |
| O4    | O3    | 2.6795       |
|       | O1    | 2.8915       |
| O3    | O5    | 2.5809       |
|       | O4    | 2.6795       |
|       | O5    | 2.7271       |
|       | O1    | 2.7293       |
|       | O8B   | 2.8248       |
| O5    | O3    | 2.5809       |
|       | O2    | 2.6887       |
|       | O3    | 2.7271       |
|       | O9A   | 2.8975       |

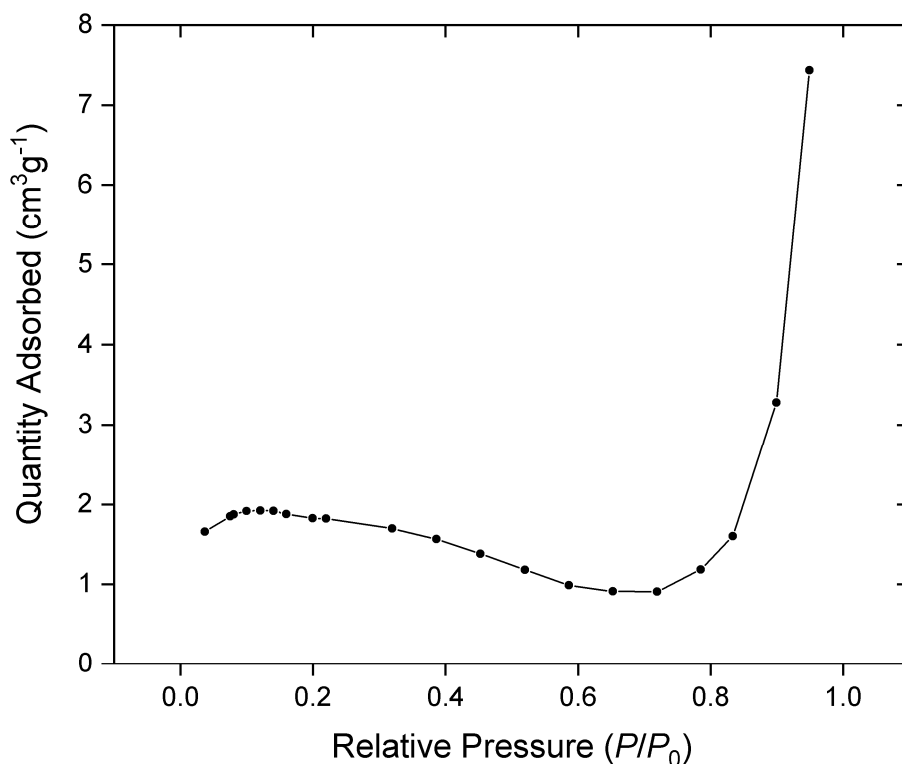

**Figure S11: BET adsorption isotherm of (1) (MicromeriticsASAP 2020) after activation of the sample at 150 °C in vacuum for 3 hours.**

## References

- 1 S. K. Ghosh and P. K. Bharadwaj, *Eur. J. Inorg. Chem.*, 2005, **2005**, 4886-4889.
- 2 H.-L. Gao, L. Yi, B. Ding, H.-S. Wang, P. Cheng, D.-Z. Liao and S.-P. Yan, *Inorg. Chem.*, 2006, **45**, 481-483.
- 3 C.-Q. Zhao, Y.-M. Ou, Z.-Y. Zhao, X.-J. Yin and Y.-M. Jiang, *Z. Kristallogr.*, 2013, **228**, 3-4.
- 4 S. Sharif, O. Sahin, I. U. Khan and O. Büyükgüngör, *J. Coord. Chem.*, 2012, **65**, 1892-1904.
- 5 S. Sharif, I. U. Khan, S. Zaheer and S. W. Ng, *Acta Crystallogr. Sect. E*, 2012, **68**, m624-m625.
- 6 M. C. Das, S. K. Ghosh, E. C. Sañudo and P. K. Bharadwaj, *Dalton Trans*, 2009, 1644-1658.
